# Supplementary material for: Troponin activator augments muscle force in nemaline myopathy patients with nebulin mutations
Source: PubMed Central journal article supplement — J Med Genet. Author manuscript; Available in PMC 2014 Jun 1. (PMC3865762; doi:10.1136/jmedgenet-2012-101470), 2013-04-09
Supplement: NIHMS535765-supplement-Supp_Table_1.pdf [file NIHMS535765-supplement-Supp_Table_1.pdf]

**Table 1 Maximal active tension and calcium-sensitivity of force generation of nemaline myopathy patients and of control subjects**

| Biopsy                                                   | Maximal active tension (mN/mm <sup>2</sup> ) |    |            |    | Calcium-sensitivity of force generation (pCa <sub>50</sub> ) |    |            |    |                         |   |            |   |
|----------------------------------------------------------|----------------------------------------------|----|------------|----|--------------------------------------------------------------|----|------------|----|-------------------------|---|------------|---|
|                                                          | Sarcomere length 2.1 µm                      |    |            |    | Sarcomere length 2.1 µm                                      |    |            |    | Sarcomere length 2.6 µm |   |            |   |
|                                                          | Vehicle                                      | n  | CK-2066260 | n  | Vehicle                                                      | n  | CK-2066260 | n  | Vehicle                 | n | CK-2066260 | n |
| <b>Nemaline myopathy patients with nebulin mutations</b> |                                              |    |            |    |                                                              |    |            |    |                         |   |            |   |
| 26-2   T33                                               | 25.6                                         | 6  | 24.9       | 6  | 5.80                                                         | 6  | 5.87       | 6  | 5.93                    | 4 | 5.91       | 4 |
| 258-2   T1069                                            | 17.6                                         | 4  | 18.0       | 4  | 5.92                                                         | 5  | 6.15       | 5  | 5.94                    | 2 | 6.15       | 2 |
| 974-1   T1033                                            | 9.8                                          | 4  | 9.3        | 4  | 5.74                                                         | 5  | 6.17       | 5  | -                       | - | -          | - |
| 988-1   T887                                             | 22.1                                         | 5  | 21.6       | 5  | 5.72                                                         | 5  | 5.91       | 5  | 5.93                    | 5 | 6.09       | 5 |
| <b>Pediatric control subjects</b>                        |                                              |    |            |    |                                                              |    |            |    |                         |   |            |   |
| 212-1   T141                                             | 69.1                                         | 6  | 69.7       | 6  | 5.89                                                         | 6  | 6.03       | 6  | 5.86                    | 1 | 6.01       | 1 |
| 213-1   T142                                             | 71.0                                         | 3  | 71.0       | 3  | 5.86                                                         | 3  | 5.92       | 3  | -                       | - | -          | - |
| 218-1   T147                                             | 110.1                                        | 4  | 103.7      | 4  | 5.87                                                         | 4  | 6.21       | 4  | 5.98                    | 4 | 6.23       | 4 |
| 219-1   T148                                             | 115.0                                        | 4  | 115.0      | 4  | 5.90                                                         | 3  | 6.02       | 3  | 6.05                    | 1 | 6.11       | 1 |
| <b>Adult control subjects</b>                            |                                              |    |            |    |                                                              |    |            |    |                         |   |            |   |
| CTRL <sub>slow</sub>                                     | 85.8                                         | 4  | 84.9       | 4  | 5.84                                                         | 4  | 5.86       | 4  | -                       | - | -          | - |
| CTRL <sub>fast</sub>                                     | 103.1                                        | 17 | 100.0      | 17 | 5.88                                                         | 20 | 6.33       | 20 | 5.86                    | 4 | 6.34       | 4 |

N.B. Due to the experimental design, at a sarcomere length of 2.6 µm some muscle preparations had to be excluded with respect to quality criteria. Therefore, the number of experiments per group is reduced at sarcomere length 2.6 µm.
